# Supplementary material for: Investigating the frequency of triploid Atlantic salmon in wild Norwegian and Russian populations
Source: Springer Nature journal article supplement (doi:10.1186/s12863-018-0676-x), 2018-10-03

# Umba\_BB830\_UMB09-27

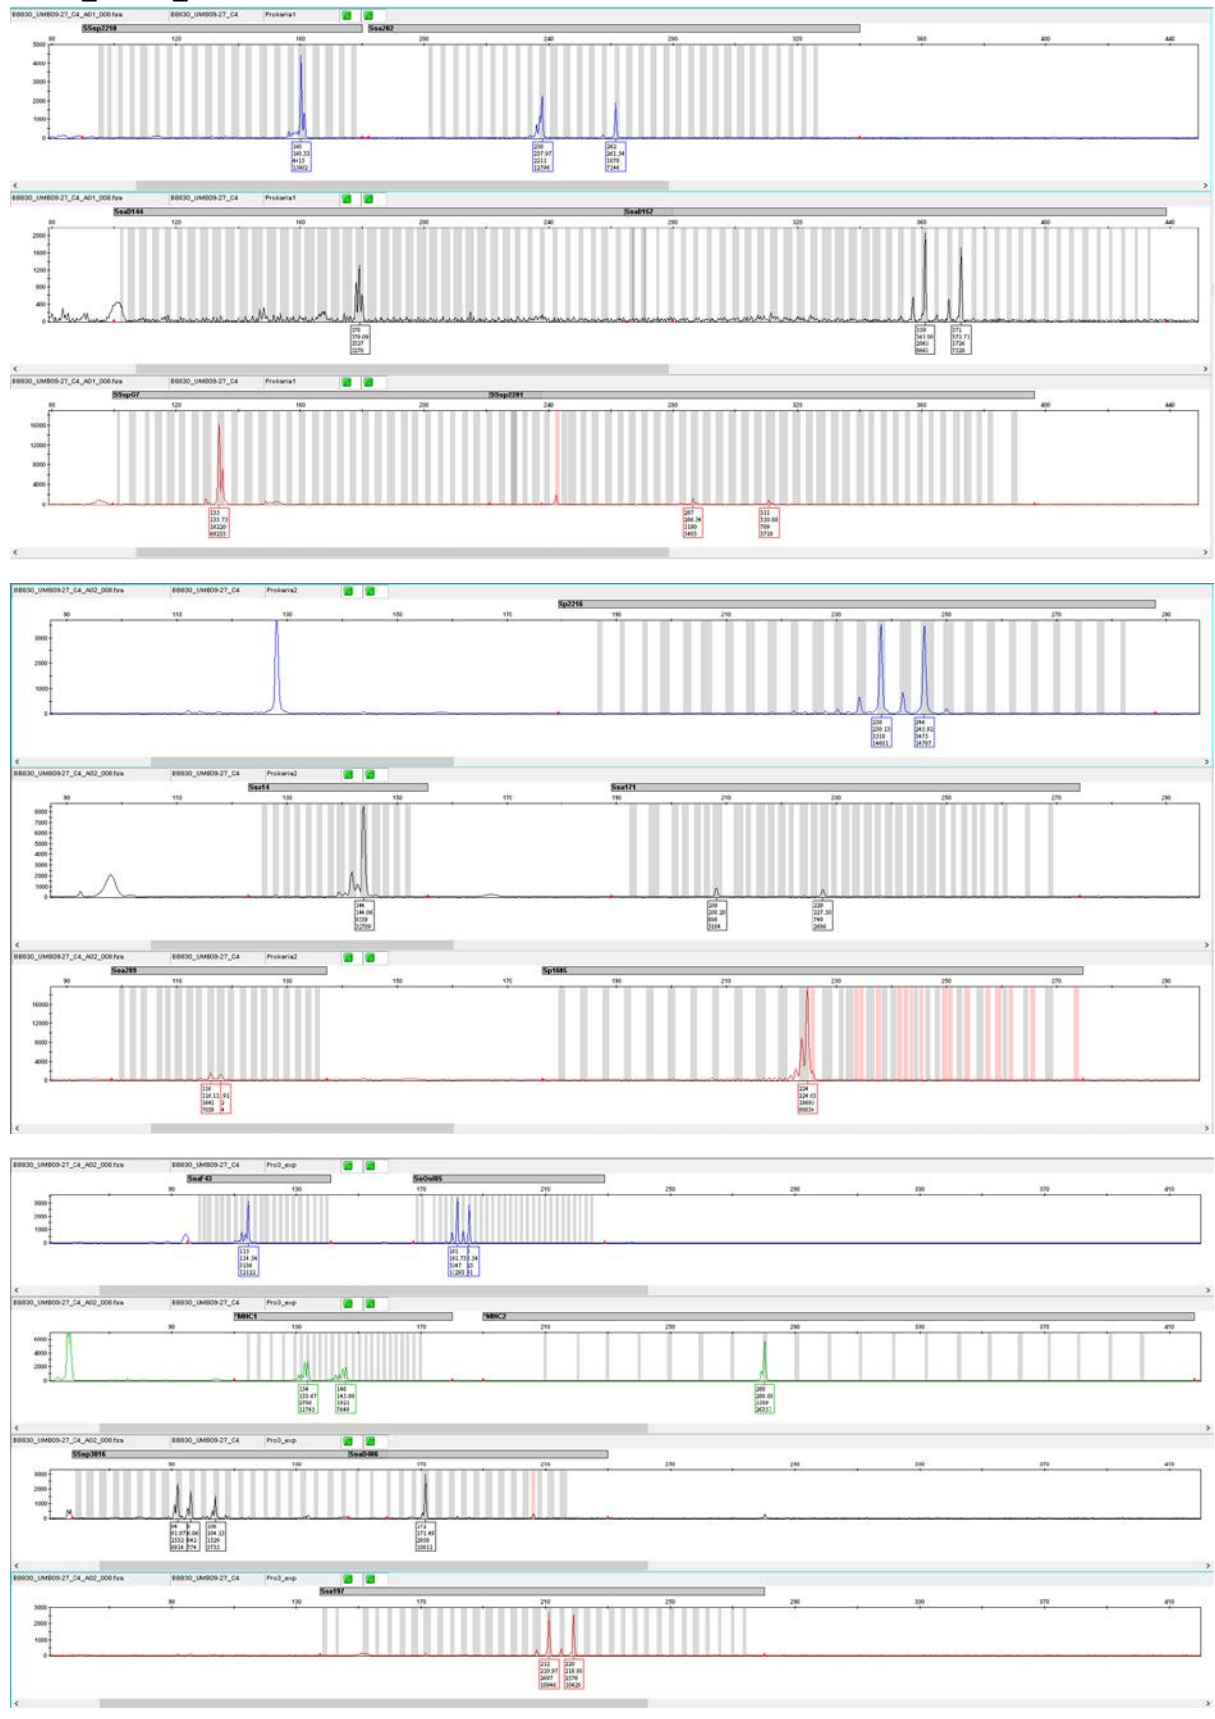

# Alta\_BB502\_AL05-6-8

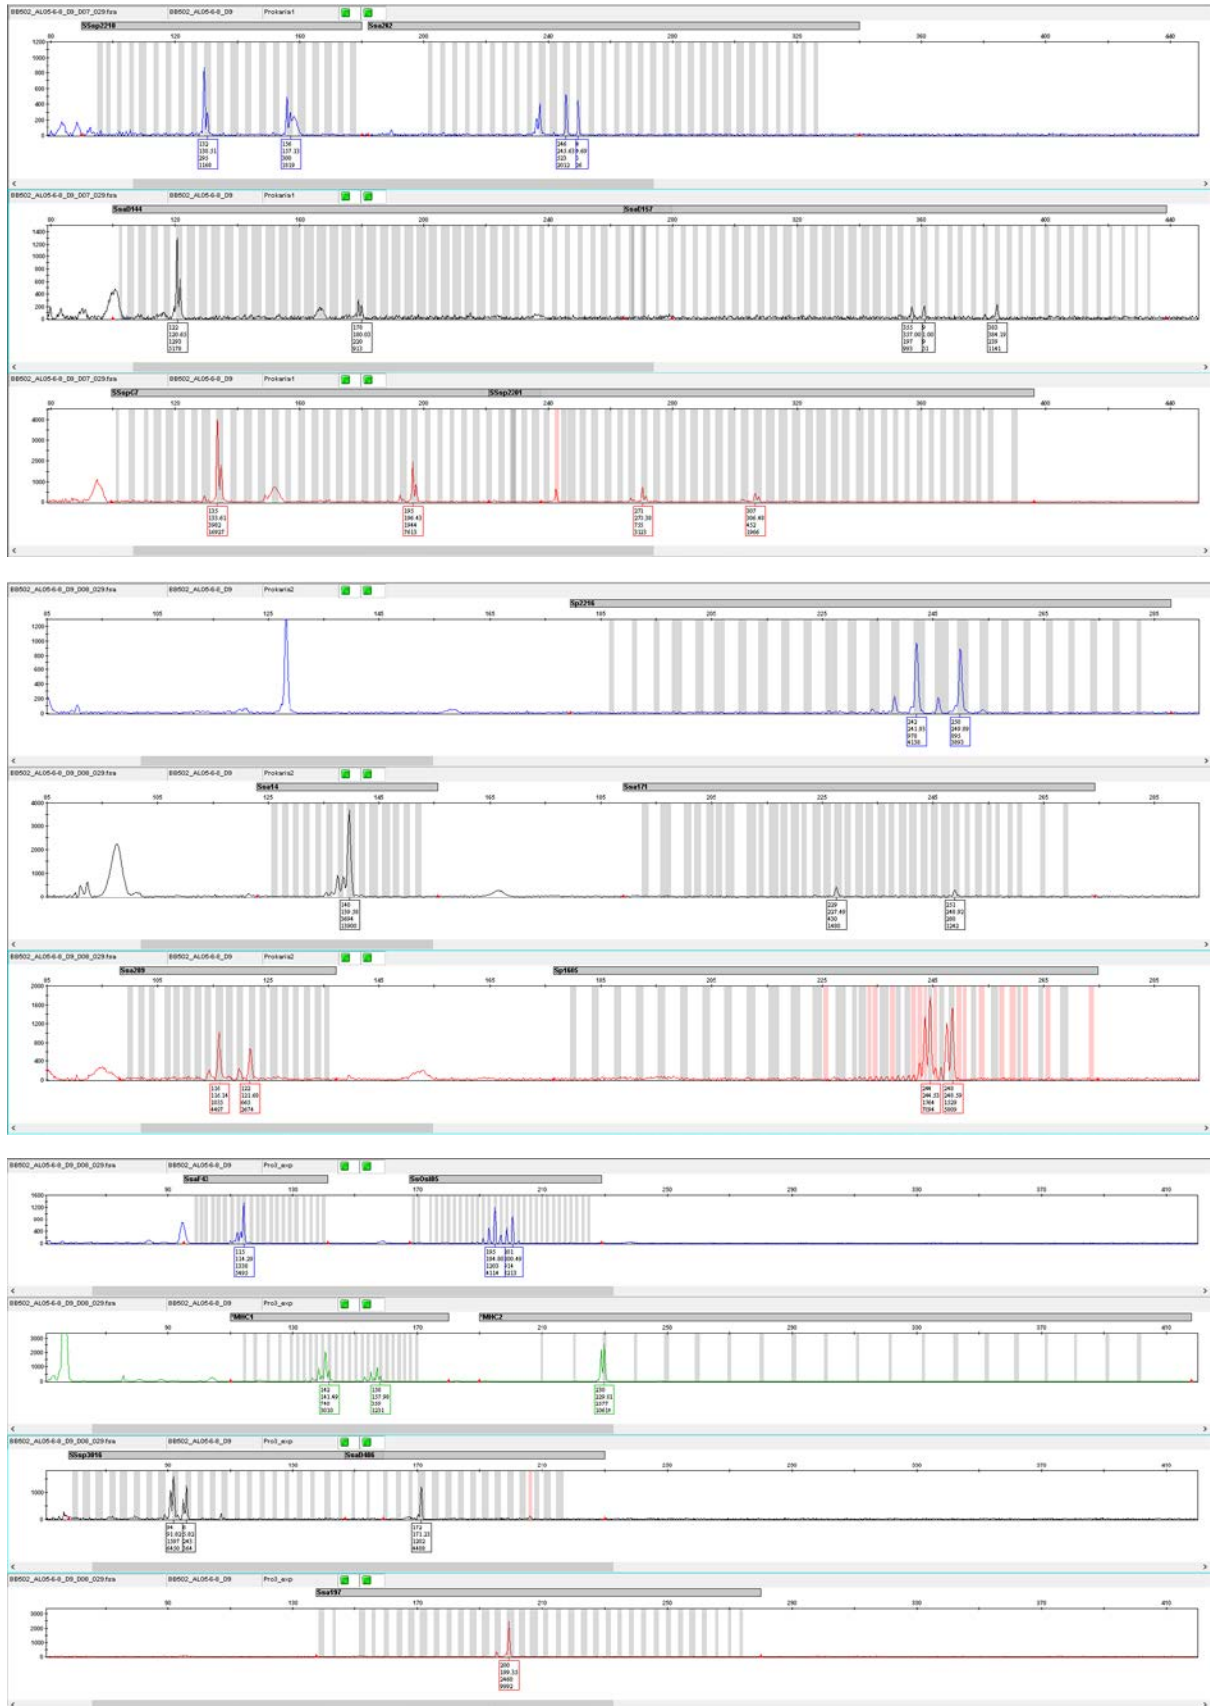

# Bogna\_BB661\_BO07-St1-30

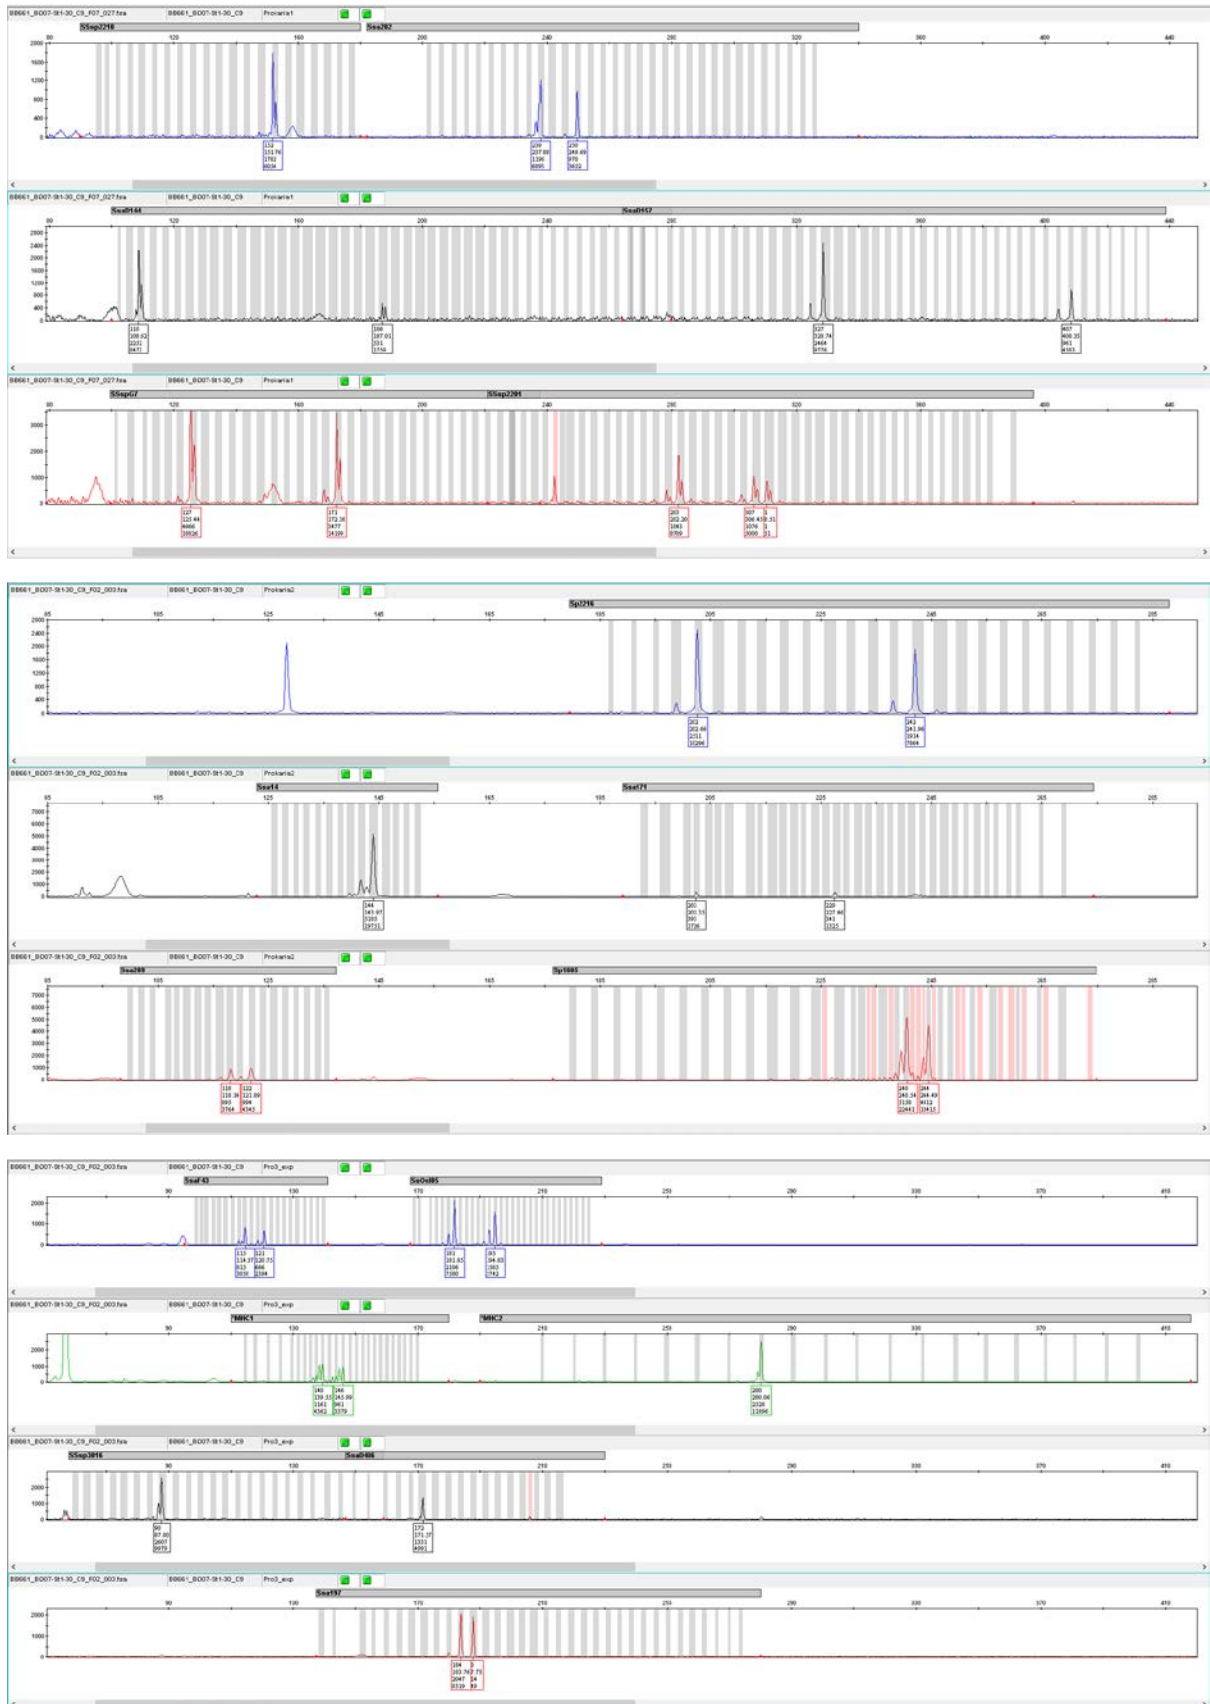





# Årdalselva\_BB766\_AD09-St1-23

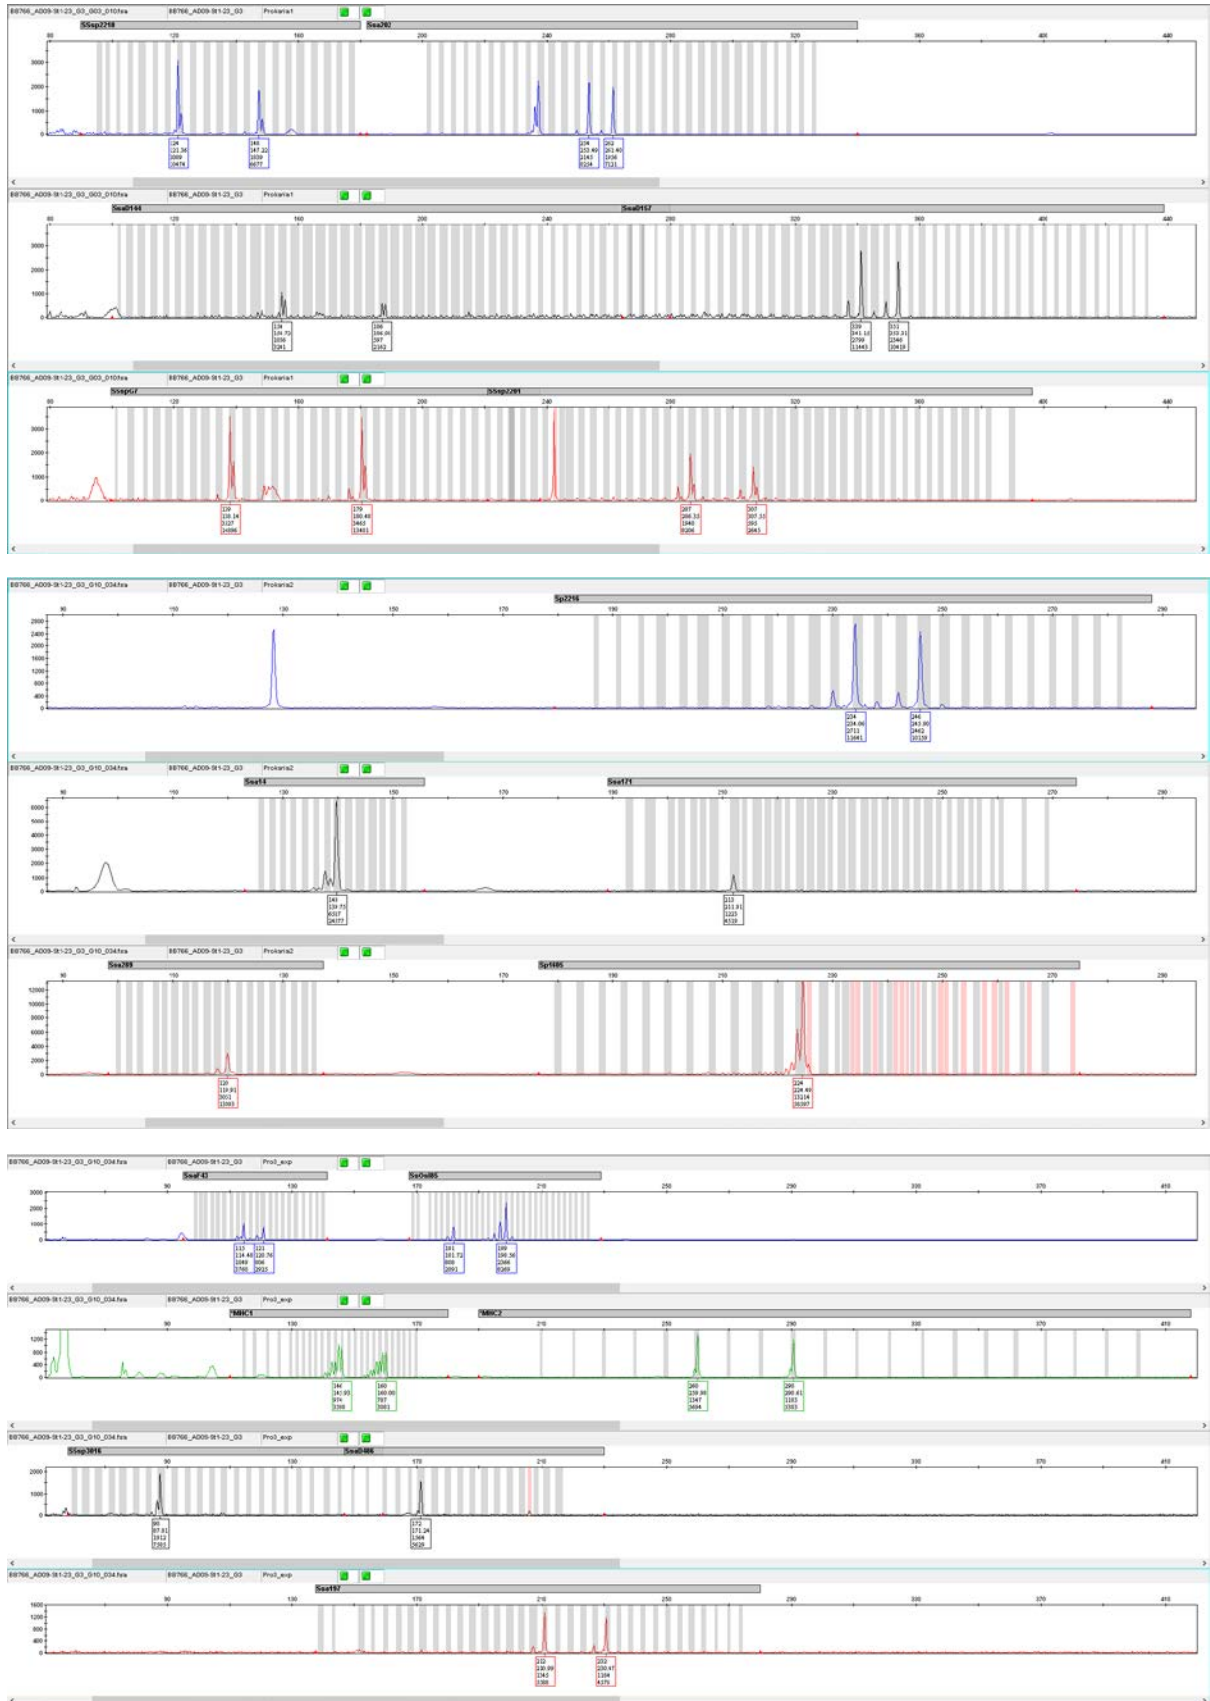

Supplement: MOESM2 [file 12863_2018_676_MOESM2_ESM.pdf]
