# Supplementary material for: Investigating the frequency of triploid Atlantic salmon in wild Norwegian and Russian populations
Source: BMC Genet. 2018 Oct 3;19:90. doi: 10.1186/s12863-018-0676-x (PMC6171226; doi:10.1186/s12863-018-0676-x)
Supplement: Supplementary file 1 — Summary of salmon ploidy per river. (XLSX 21 kb) [file 12863_2018_676_MOESM1_ESM.xlsx]

## Sheet: Sheet1
No	Name	Abbrev.	Year	Project	Box number	Life stage	Diploids	Triploids	Trisomic	Fail	Total	Comments
1	Onega	ONG	2009	NR	BB840	Smolt	88	0	0	0	88
2	Kovda	KOV	2009	NR	BB879	Parr/fry	47	0	0	0	47
3	Kanda	KAN	2009	NR	BB861	Parr/fry	17	0	0	0	17
4	Kolvitsa	KLV	2009	NR	BB879	Parr/fry	45	0	0	0	45
5	Umba	UMB	2009	NR	BB830	Parr/fry	85	0	1	8	94
6	Varzuga	VRG	2009	NR	BB839, BB863	Parr/fry	91	0	0	0	91
7	Kitsa	KTS	2009	NR	BB837, BB864	Parr/fry	96	0	1	0	97
8	Ponoi	PMS	2008/9	NR	BB815, BB878	Parr/fry	140	0	0	1	141
9	Drozdovka	DRO	2009	NR	BB861	Parr/fry	31	0	0	0	31
10	Sidorovka	SID	2009	NR	BB864, BB870	Parr/fry	58	0	0	0	58
11	Vostochnaya Litsa	VLT	2009	NR	BB841	Parr/fry	41	0	0	0	41
12	Zolotaya	ZLT	2009	NR	BB829	Parr/fry	89	0	0	0	89
13	Rynda	RYN	2009	NR	BB841, BB837	Parr/fry	80	0	0	0	80
14	Orlovka	ORL	2009	NR	BB828	Parr/fry	68	0	0	9	77
15	Dolgaya	DLG	2009	NR	BB861, BB886	Parr/fry	75	0	0	2	77
16	Kola	KOL	2009	NR	BB839, BB863	Parr/fry	97	0	0	0	97
17	Pak	PAK	2009	NR	BB889, BB890	Parr/fry	83	0	0	2	85
18	Ulita	ULI	2009	NR	BB889	Parr/fry	21	0	0	0	21
19	Pecha	PCH	2009	NR	BB889	Parr/fry	20	0	0	0	20
20	Kulonga	KLN	2009	NR	BB840	Parr/fry	47	0	0	0	47
21	Ura	URA	2009	NR	BB878	Parr/fry	47	0	0	0	47
22	Bolshaya Zapadnaya Litsa	BZL	2009	NR	BB890	Parr/fry	39	0	0	0	39
23	Pyave	PYA	2009	NR	BB840	Parr/fry	38	0	0	0	38
24	Pechenga	PEC	2009	NR	BB886	Parr/fry	44	0	0	0	44
25	Munkelva	MUN	2010	NR	BB924	Parr/fry	91	0	0	1	92
26	Neiden	NE	2006	NR	BB403	Parr/fry	94	0	0	0	94
27	Komagelva	KO	2006/9	NR	BB374, BB934	Parr/fry	129	0	0	1	130
28	Iesjohka	LE	2006	NR	BB379	Parr/fry	94	0	0	0	94
29	Laksjohka	LJ	2007	NR	BB559	Parr/fry	93	0	0	0	93
30	Repparfjordelva	RF	2006	NR	BB383	Parr/fry	94	0	0	0	94
31	Alta	AL	2005	NR	BB502	Parr/fry	85	0	1	0	86
32	Målselv	ME	2007	NR	BB589	Parr/fry	80	0	1	1	82
33	Laukhelle	LH	2006	NR	BB373	Parr/fry	87	0	0	0	87
34	Saltdalselva	SE	2007	NR	BB520	Parr/fry	72	0	0	0	72
35	Beiarelva	BA	2007	NR	BB593	Parr/fry	35	0	0	0	35
36	Åbjøra	AB	2007/8	N	BB593, BB696	Parr/fry	92	0	0	3	95
37	Namsen hoved (St1-3)	NA	2007	N	BB513	Parr/fry	4	0	0	0	4
38	Bogna	BO	2007	N	BB660, BB661	Parr/fry	103	0	1	0	104
39	Årgårdsvassdraget	AR	2007	N	BB523	Parr/fry	94	0	0	0	94
40	Steinsdalselva	SN	2007	N	BB516	Parr/fry	93	0	0	0	93
41	Nordalselva	NO	2008	N	BB665	Parr/fry	34	0	0	0	34
42	Stordalselva	SA	2007	N	BB500	Parr/fry	68	0	0	0	68
43	Skauga	SK	2007	N	BB660	Parr/fry	71	0	0	0	71
44	Verdalselva	VE	2007	N	BB506	Parr/fry	95	0	0	0	95
45	Levangerelva	LE	2007	N	BB662	Parr/fry	83	0	0	0	83
46	Stjørdalselva	SJ	2007	N	BB532	Parr/fry	92	0	0	1	93
47	Homla	H	2007	N	BB569	Parr/fry	93	0	0	0	93
48	Nidelva	NI	2007	N	BB513	Parr/fry	82	0	0	0	82
49	Gaula	GA	2007	N	BB498	Parr/fry	93	0	0	0	93
50	Vigda	VG	2007	N	BB570	Parr/fry	84	0	1	2	87
51	Børsa	BR	2007	N	BB665	Parr/fry	46	0	0	0	46
52	Orkla	OR	2007	N	BB499, BB500	Parr/fry	104	0	0	1	105
53	Eira	EV	2006	N	BB552	Parr/fry	81	0	0	0	81
54	Visa	VIS	2009	N	BB934	Parr/fry	36	0	0	2	38
55	Korsbrekkeelva	KB	2009	N	BB827	Parr/fry	46	0	0	0	46
56	Ervikelva	EE	2007	N	BB521	Parr/fry	62	0	0	1	63
57	Eidselva	Ei	2007/8	N	BB859, BB860	Adult	104	0	0	1	105
58	Stryneelva	ST	2007	N	BB515	Parr/fry	73	0	0	2	75
59	Gjengedalsvassdraget	GV	2007	N	BB667	Parr/fry	61	0	2	0	63
60	Osenelva	OS	2008	N	BB740	Parr/fry	94	0	0	0	94
61	Nausta	??	2007	N	BB602	Parr/fry	72	0	0	22	94
62	Jølstra	JS	2007	N	BB736	Parr/fry	91	0	0	0	91
63	Flekkeelva	Fle	2007/8	N	BB867, BB870	Parr/fry	103	0	0	0	103
64	Daleelva Høyanger	Da	2001/2	N	BB843, BB859	Adult	105	0	0	0	105
65	Årøyelva	AE	2007	N	BB662	Adult	8	0	0	0	8
66	Flåmselva	FL	2007	N	BB585	Parr/fry	82	0	0	9	91
67	Nærøydalselva	NR	2003/4	N	BB870	Adult	68	0	0	0	68
68	Vikja	Vi	2006/8	N	BB860	Adult	64	1	0	0	65
69	Oselva	OS	2008	N	BB584	Parr/fry	92	0	0	0	92
70	Etneelva	ET	2006	N	BB358	Parr/fry	91	0	2	0	93
71	Vikedalselva	VI	2006	N	BB359	Parr/fry	92	0	0	0	92
72	Suldalslågen	SL	2007	N	BB669	Parr/fry	91	0	0	1	92
73	Vorma	VR	2009	N	BB767	Parr/fry	94	0	0	0	94
74	Årdalselva	AD	2009	N	BB766	Parr/fry	91	0	2	0	93
75	Lyseelva	LY	2009	N	BB803	Parr/fry	94	0	0	0	94
76	Espedalsvassdraget	ES	2009	N	BB807	Parr/fry	94	0	0	0	94
77	Frafjordelva	FF	2009	N	BB806	Parr/fry	89	0	0	0	89
78	Figgjo	FI	2006	N	BB380	Parr/fry	92	0	0	1	93
79	Håelva	HA	2006	N	BB742	Parr/fry	63	0	0	0	63
80	Storelva Tvedestrand	SH	2008	N	BB843	Smolt	5	0	0	0	5
	SUM						5910	1	12	71	5994
																		BB663B er et reisolat. Men ut fra dato på GM prosjektene er de B lest av før enn første isolat. Du får se hvilke som er best.
																		Inneholder MHC1, -2 og OSL85 (pluss andre du ikke skal undersøke)
																		Det finnes noen eldre kjøringer av BB358 (P1-2-3). Har ikke tatt dem med.
																		Det finnes noen eldre kjøringer av BB359 (P1-2-3). Har ikke tatt dem med.
																		Det finnes noen eldre kjøringer av BB380 (P1-2-3). Har ikke tatt dem med.
																		Se i journalene om du kan finne ut hvilke analyser som er kjørt på dette brettet. Finner ikke mer enn 4 markører.
																		Se i journalene om du kan finne ut hvilke analyser som er kjørt på dette brettet. Finner ikke mer enn 4 markører.
